# Supplementary material
Source: publisher figshare collection journal article supplement (https://acs.figshare.com/ndownloader/files/24166035)
Supplement: Supplementary file 1 [file 24166035]

# Single-Crystal Synthesis and Diverse Topologies of Hexanuclear Ce<sup>IV</sup>-based Metal-Organic Frameworks

Yu-Feng Zhang,<sup>a</sup> Qian Wang,<sup>a</sup> Dong-Xu Xue,<sup>\*a</sup> and Junfeng Bai<sup>\*a,b</sup>

<sup>a</sup>Key Laboratory of Applied Surface and Colloid Chemistry, Ministry of Education, School of Chemistry & Chemical Engineering, Shaanxi Normal University, Xi'an 710062, China

<sup>b</sup>State Key Laboratory of Coordination Chemistry, School of Chemistry and Chemical Engineering, Nanjing University, Nanjing 210093, China

Corresponding authors:

Email: [xuedx@snnu.edu.cn](mailto:xuedx@snnu.edu.cn)

Email: [bjunfeng@nju.edu.cn](mailto:bjunfeng@nju.edu.cn), [bjunfeng@snnu.edu.cn](mailto:bjunfeng@snnu.edu.cn).

## Table of Contents

|                                                               |            |
|---------------------------------------------------------------|------------|
| <b>Section 1. Materials and Methods.....</b>                  | <b>S02</b> |
| <b>Section 2. Synthetic Procedure for SC-Ce-MOF-1–4.....</b>  | <b>S03</b> |
| <b>Section 3. Additional Structural Figures.....</b>          | <b>S04</b> |
| <b>Section 4. PXRD, TGA plots and FT-IR Spectra.....</b>      | <b>S09</b> |
| <b>Section 5. Low-Pressure Gas Sorption Measurements.....</b> | <b>S12</b> |
| <b>Section 6. Crystal Images.....</b>                         | <b>S20</b> |
| <b>Section 7. Single-Crystal X-Ray Crystallography.....</b>   | <b>S21</b> |
| <b>Section 8. References.....</b>                             | <b>S26</b> |

## **Section 1. Materials and Methods.**

All reagents were obtained from commercial sources and used without further purification. PXRD measurements were performed on a Rigaku MiniFlex 600 diffractometer with Cu K $\alpha$  ( $\lambda$  = 1.5406 Å), and the X-ray tube was operated at 40 kV and 15 mA. High resolution thermogravimetric analysis (TGA) were performed under a continuous N<sub>2</sub> flow and recorded on a Q600SDT thermal analyzer with a heating rate of 5°C per minute. Fourier-transform infrared (FT-IR) spectrum (4000-400 cm<sup>-1</sup>, KBr pellet) was collected in the solid state on a Bruker Tensor 27 FT-IR spectrometer. The morphologies of the samples were obtained on a Desktop Scanning Electron Microscope (TM300).

## Section 2. Synthetic Procedure for SC-Ce-MOF-1–4.

**Synthesis of SC-Ce-MOF-1:** Terephthalic acid (7.2 mg, 0.0435 mmol),  $(\text{NH}_4)_2\text{Ce}(\text{NO}_3)_6 \cdot 6\text{H}_2\text{O}$  (23.85 mg, 0.0435 mmol), DMF (1.5 mL),  $\text{C}_2\text{H}_5\text{OH}$  (0.5 mL), 2-fluorobenzoic acid DMF solution (0.5 mL, 3.48 mol L<sup>-1</sup>) were combined in a 20 mL scintillation vial, sealed and heated to 105 °C for 36 h and cooled to room temperature. The yellow hexagonal prism crystals were collected and DMF washed. CHN elemental analysis (%) for SC-Ce-MOF-1,  $[\text{Ce}_6(\text{OH})_4(\text{O})_4(\text{C}_8\text{H}_4\text{O}_4)_6(\text{H}_2\text{O})_6] \cdot (\text{C}_3\text{H}_7\text{ON})_3(\text{H}_2\text{O})_{16}$ : Calculated C (26.61), H (3.64), N (1.63); Found C (26.42), H (3.01), N (1.61).

**Synthesis of SC-Ce-MOF-2:** 2-Fluoroterephthalic acid (8.0 mg, 0.0435 mmol),  $(\text{NH}_4)_2\text{Ce}(\text{NO}_3)_6 \cdot 6\text{H}_2\text{O}$  (23.85 mg, 0.0435 mmol), DMF (1.5 mL),  $\text{C}_2\text{H}_5\text{OH}$  (0.5 mL), 2-fluorobenzoic acid DMF solution (0.7 mL, 3.48 mol L<sup>-1</sup>) were combined in a 20 mL scintillation vial, sealed and heated to 105 °C for 36 h and cooled to room temperature. The extremely fine yellow hexagonal prism crystals were collected and DMF washed. CHN elemental analysis (%) for SC-Ce-MOF-2,  $[\text{Ce}_6(\text{OH})_4(\text{O})_4(\text{C}_8\text{H}_3\text{FO}_4)_6(\text{H}_2\text{O})_6] \cdot (\text{C}_3\text{H}_7\text{ON})_{3.5}(\text{H}_2\text{O})_{22}$ : Calculated C (24.87), H (3.66), N (1.74); Found C (24.80), H (3.26), N (1.77).

**Synthesis of SC-Ce-MOF-3:** 2-Aminoterephthalic acid (7.9 mg, 0.0435 mmol),  $(\text{NH}_4)_2\text{Ce}(\text{NO}_3)_6 \cdot 6\text{H}_2\text{O}$  (47.7 mg, 0.087 mmol), DMF (2.0 mL),  $\text{C}_2\text{H}_5\text{OH}$  (0.5 mL), 2-fluorobenzoic acid DMF solution (0.4 mL, 3.48 mol L<sup>-1</sup>) were combined in a 20 mL scintillation vial, sealed and heated to 105 °C for 48 h and cooled to room temperature. The light brown polyhedral crystals were collected and DMF washed. CHN elemental analysis (%) for SC-Ce-MOF-3,  $[\text{Ce}_6(\text{OH})_4(\text{O})_4(\text{C}_8\text{H}_5\text{NO}_4)_6(\text{H}_2\text{O})_6] \cdot (\text{C}_3\text{H}_7\text{ON})_5(\text{H}_2\text{O})_{40}$ : Calculated C (23.34), H (5.01), N (4.75); Found C (22.94), H (4.75), N (4.84).

**Synthesis of SC-Ce-MOF-4:** Naphthalene-2,6-dicarboxylic acid (9.4 mg, 0.0435 mmol),  $(\text{NH}_4)_2\text{Ce}(\text{NO}_3)_6 \cdot 6\text{H}_2\text{O}$  (23.85 mg, 0.0435 mmol), DMF (2.0 mL),  $\text{C}_2\text{H}_5\text{OH}$  (0.5 mL), 2-fluorobenzoic acid DMF solution (0.6 mL, 3.48 mol L<sup>-1</sup>) were combined in a 20 mL scintillation vial, sealed and heated to 105 °C for 36 h and cooled to room temperature. The yellow polyhedral crystals were collected and DMF washed. CHN elemental analysis (%) for SC-Ce-MOF-4,  $[\text{Ce}_6(\text{OH})_4(\text{O})_4(\text{C}_{12}\text{H}_6\text{O}_4)_6(\text{H}_2\text{O})_6] \cdot (\text{C}_3\text{H}_7\text{ON})_{10}(\text{H}_2\text{O})_{25}$ : Calculated C (34.54), H (4.89), N (3.95); Found C (34.23), H (4.18), N (4.23).

### Section 3. Additional Structural Figures.

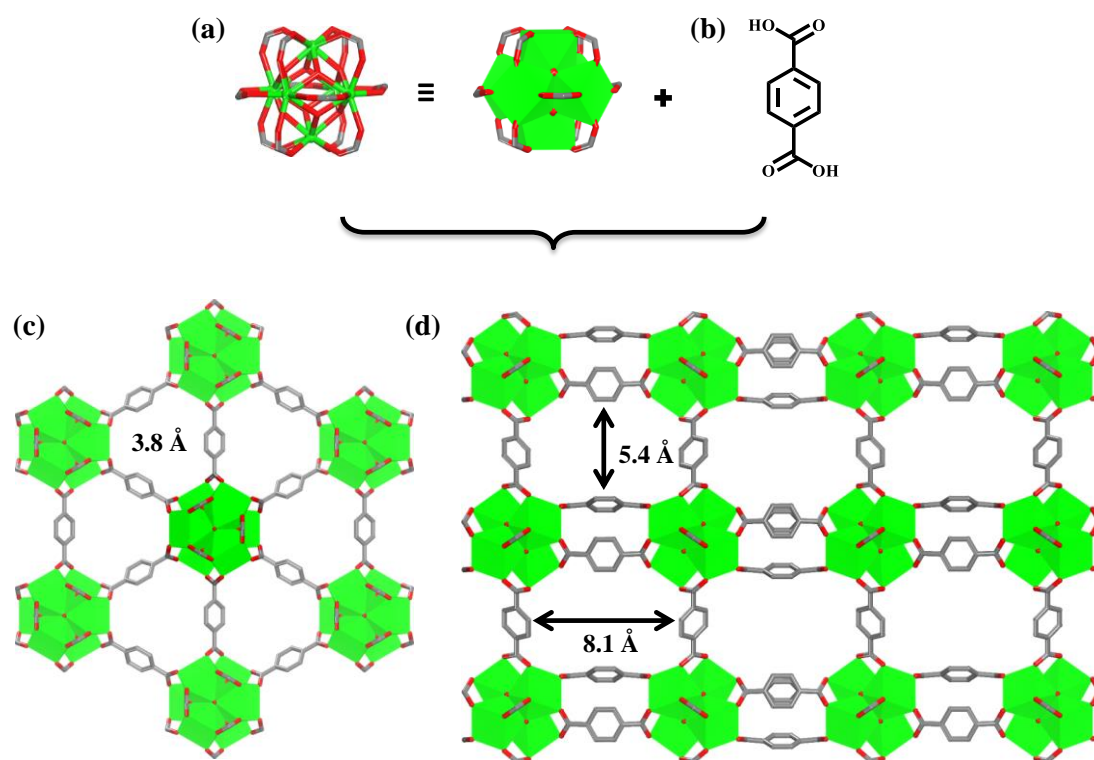

**Figure S1.** Schematic representations of SC-Ce-MOF-1 constructed from the assembly of hexanuclear Ce(IV)-based MBB and the organic linker of H<sub>2</sub>BDC (b) to produce a 3-periodic net along *c*-axis (c) and *b*-axis (d) associated with the channel sizes of 3.8 Å, 5.4 × 8.1 Å<sup>2</sup>, respectively. Hydrogen atoms and coordinated water molecules are omitted for clarity. Ce = green, C = gray, O = red.

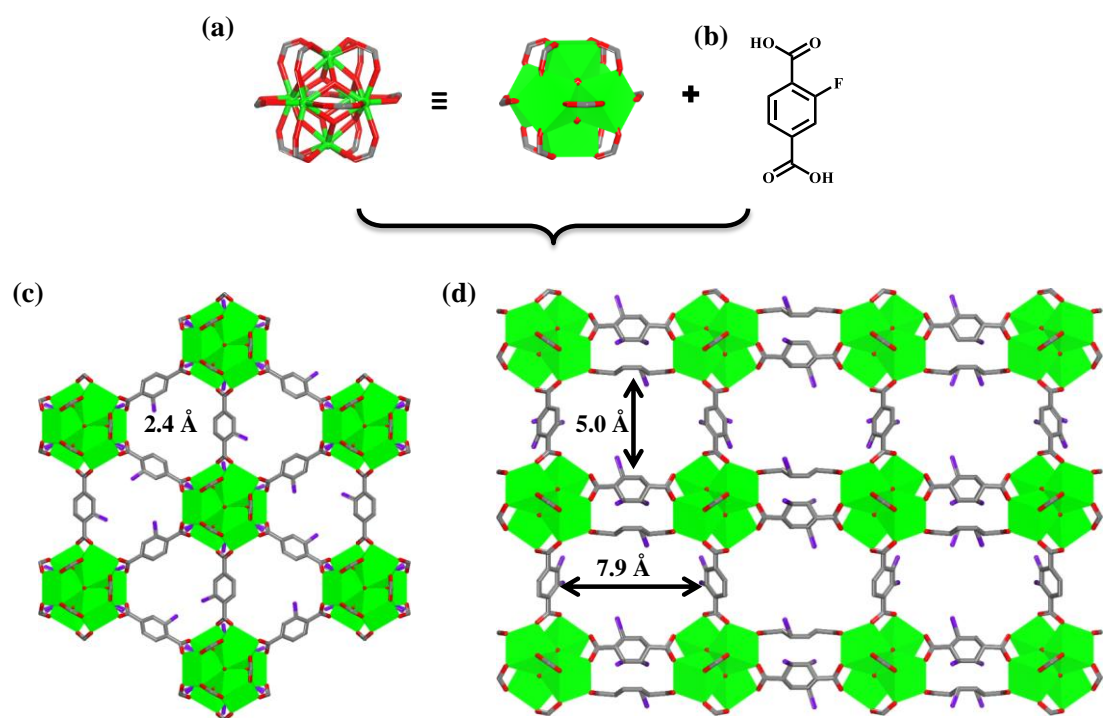

**Figure S2.** Schematic representations of SC-Ce-MOF-2 constructed from the assembly of hexanuclear Ce(IV)-based MBB (a) and the organic linker of H<sub>2</sub>FBDC (b) to generate a 3-periodic net along *c*-axis (c) and *b*-axis (d) associated with the channel sizes of 2.4 Å, 5.0 × 7.9 Å<sup>2</sup>, respectively. Hydrogen atoms and coordinated water molecules are omitted for clarity. Ce = green, C = gray, O = red, F = purple.

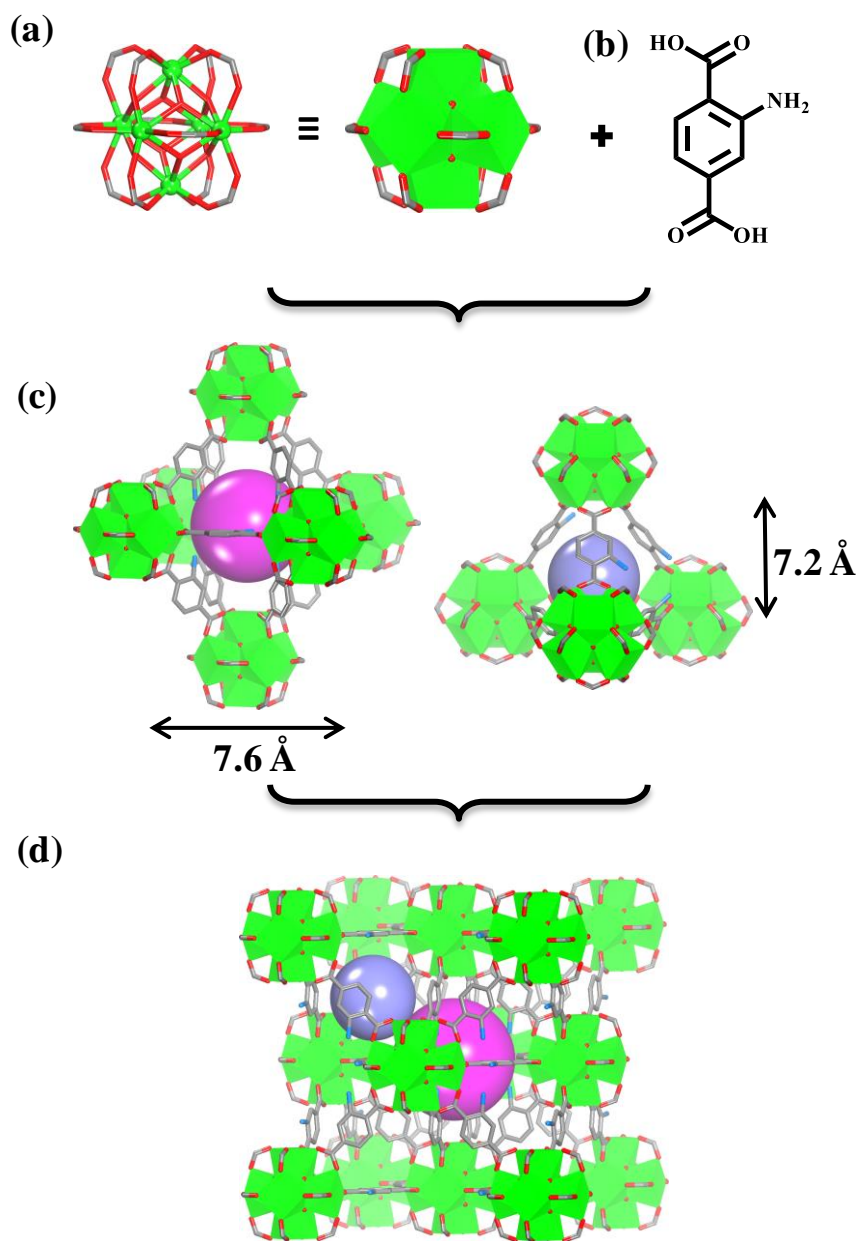

**Figure S3.** Schematic representations of SC-Ce-MOF-3 constructed from the assembly of hexanuclear Ce(IV)-based MBB and the organic linker of H<sub>2</sub>ABDC to generate a 3-periodic **fcu** net, and the cages are: 7.6 Å and 7.2 Å, respectively. Hydrogen atoms and coordinated water molecules are omitted for clarity. Ce = green, C = gray, O = red, N = blue.

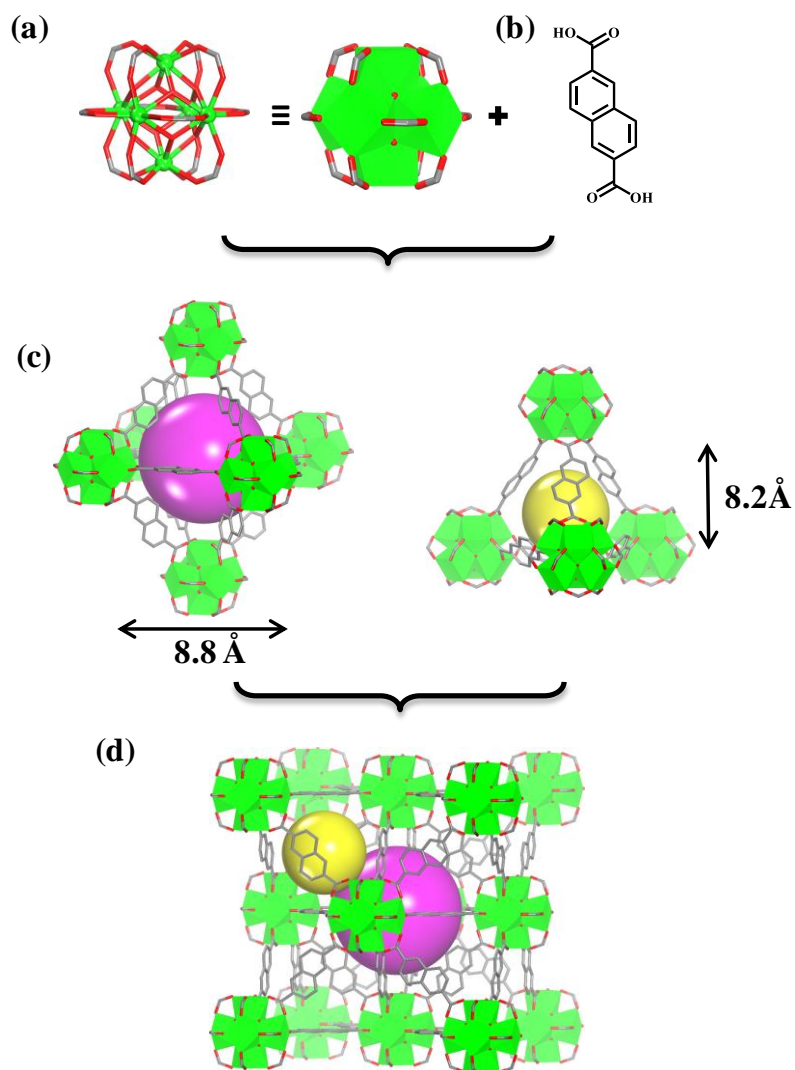

**Figure S4.** Schematic representations of SC-Ce-MOF-4 constructed from the assembly of hexanuclear Ce(IV)-based MBB and the organic linker of H<sub>2</sub>NDC to generate a 3-periodic **fcu** net, and the two cages are: 8.8 Å and 8.2 Å. Hydrogen atoms and coordinated water molecules are omitted for clarity. Ce = green, C = gray, O = red.

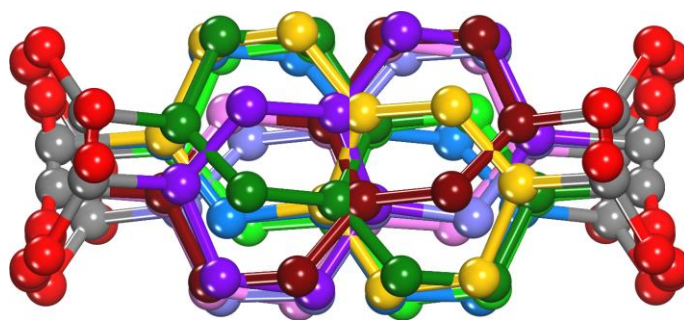

**Figure S5.** Highly disordered 2,6-NDC molecule in the SC-Ce-MOF-4.

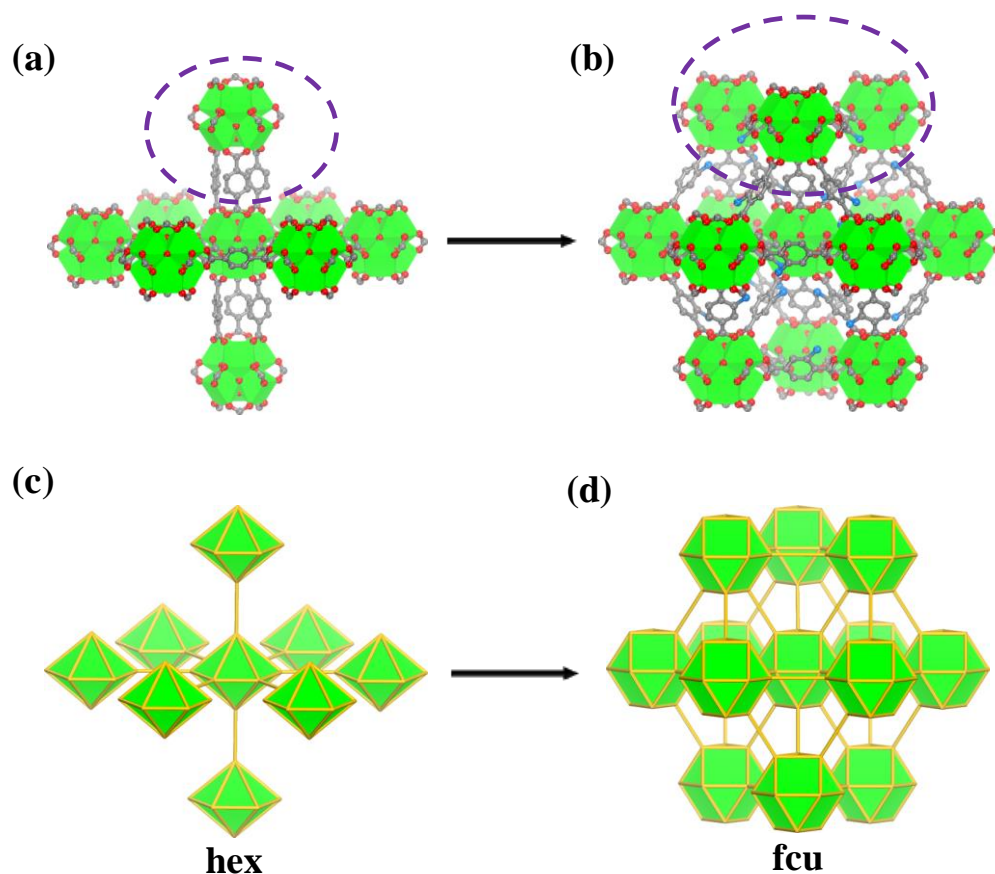

**Figure S6.** Schematic representations of the detailed structural differences surrounding the MBBs in SC-Ce-MOF-1 (a) and SC-Ce-MOF-3 (b) and topological analysis of SC-Ce-MOF-1 (c) and SC-Ce-MOF-3 (d), respectively. Hydrogen atoms and coordinated water molecules are omitted for clarity. Ce = green, C = gray, O = red, N = blue.



#### Section 4. PXRD, TGA plots and FT-IR spectra.

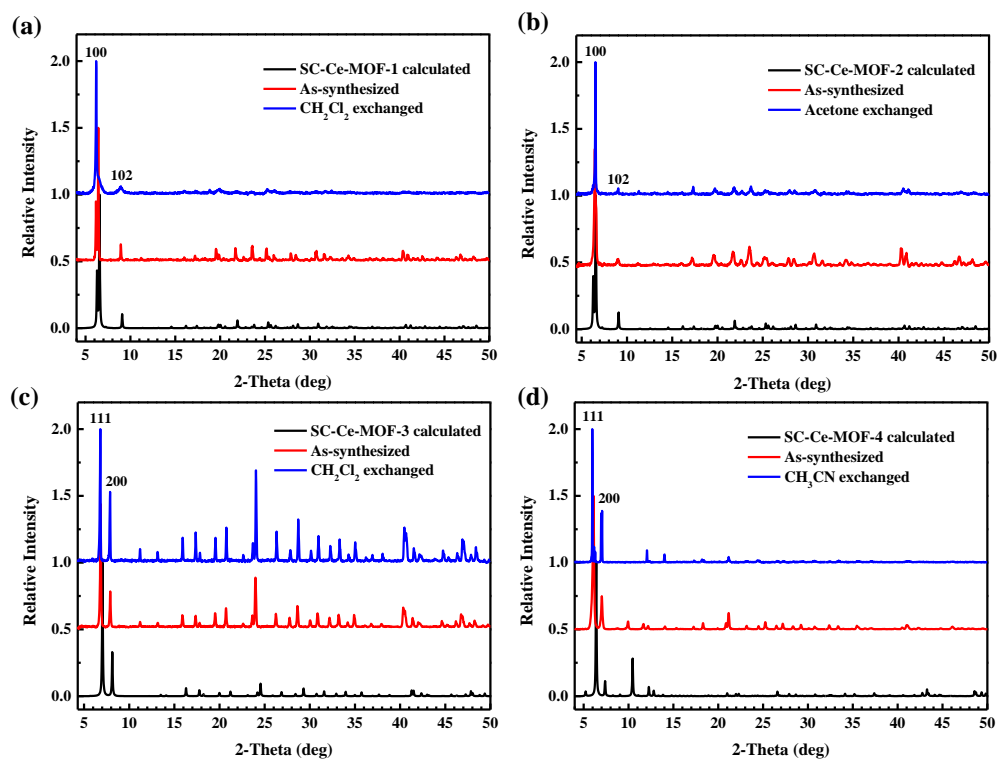

**Figure S7.** Powder X-ray diffraction (PXRD) patterns of the calculated, as-synthesized, and solvent-exchanged compounds of SC-Ce-MOF-1 (a), SC-Ce-MOF-2 (b), SC-Ce-MOF-3 (c) and SC-Ce-MOF-4 (d).

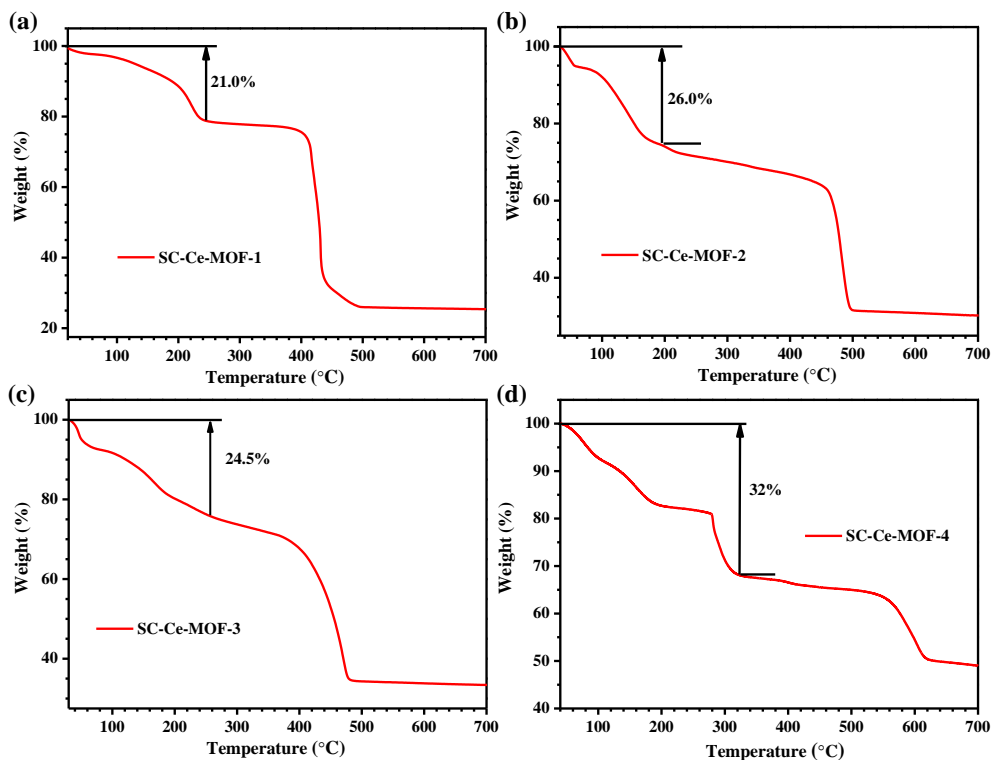

**Figure S8.** TGA plots of the as-synthesized SC-Ce-MOF-1 (a): <230°C, Loss of free/surface/coordinated solvent/water; >390 °C, framework degradation. SC-Ce-MOF-2 (b): <194°C, Loss of free/surface/coordinated solvent/water; >450 °C, framework degradation. SC-Ce-MOF-3 (c): <255°C, Loss of free/surface/coordinated solvent/water; >374 °C, framework degradation. SC-Ce-MOF-4 (d): <323°C, Loss of free/surface/coordinated solvent/water; >530 °C, framework degradation.

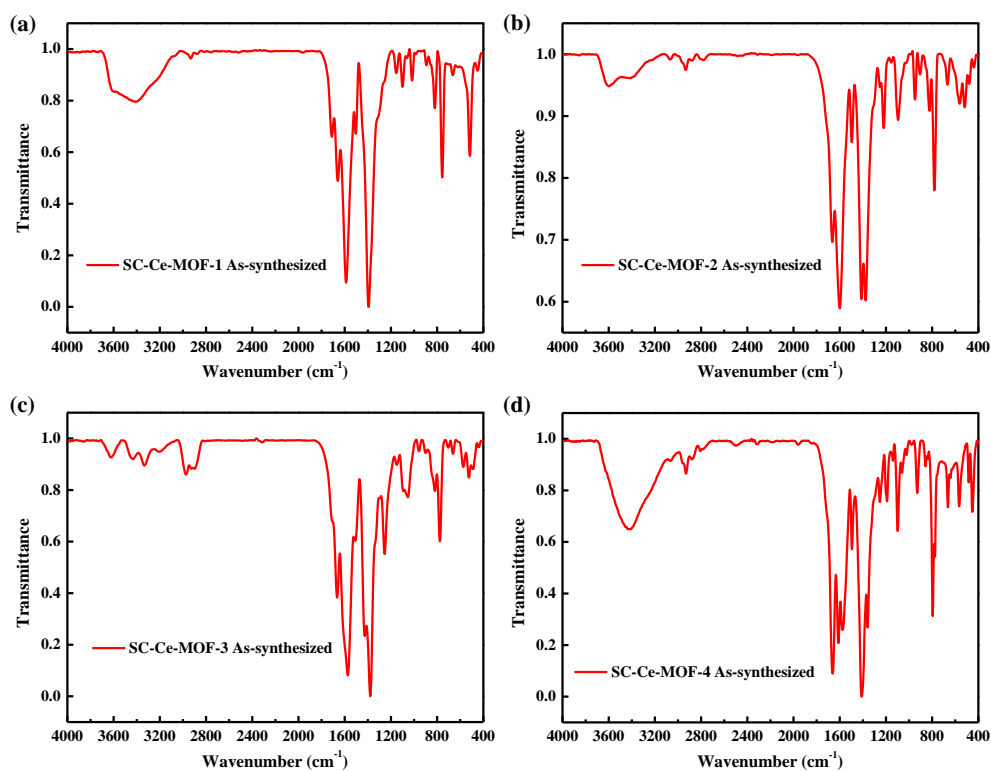

**Figure S9.** FT-IR spectra of the as-synthesized SC-Ce-MOF-1 (a), SC-Ce-MOF-2 (b), SC-Ce-MOF-3 (c) and SC-Ce-MOF-4 (d).

## Section 5. Low-Pressure Gas Sorption Measurements.

**Gas Sorption.** Gas adsorption studies were conducted on a fully automated micropore gas analyzer Autosorb-iQ3 (Quantachrome Instruments) at relative pressures up to 1 atm. The cryogenic temperature was controlled using liquid nitrogen at 77 K. The bath temperature for the CH<sub>4</sub> and CO<sub>2</sub> sorption measurements was controlled using a recirculating bath containing an ethylene glycol/H<sub>2</sub>O mixture. The apparent surface areas were determined from the nitrogen adsorption isotherms collected at 77 K by applying the BET models. Pore size analyses were performed using a cylindrical/spherical NLDFT pore model system by assuming an oxidic (zeolitic) surface. After exchanged with solvents, all of the samples were activated at 80 °C, 80 °C, 30 °C and 100 °C for 12 hours (30 °C for 4 hours and then heated to higher temperatures for 8 hours, and the heating rate is 1 °C/minute), under vacuum prior to N<sub>2</sub> sorption measurements, respectively.

**Isosteric Heat of Adsorption.** The isosteric heat of adsorption represents the strength of the interactions between adsorbate molecules and the adsorbent lattice atoms and can be used as a measurement of the energetic heterogeneity of a solid surface. The isosteric heat of adsorption at a given amount can be calculated by the Clausius–Clapeyron equation as

$$Q_{\text{st}} = -RT^2 \left( \frac{\partial \ln P}{\partial T} \right) n_a$$

where  $Q_{\text{st}}$  is the isosteric heat of adsorption (kJ mol<sup>-1</sup>),  $P$  is the pressure (kPa),  $T$  is the temperature,  $R$  is the gas constant, and  $n_a$  is the adsorption amount (mmol g<sup>-1</sup>).

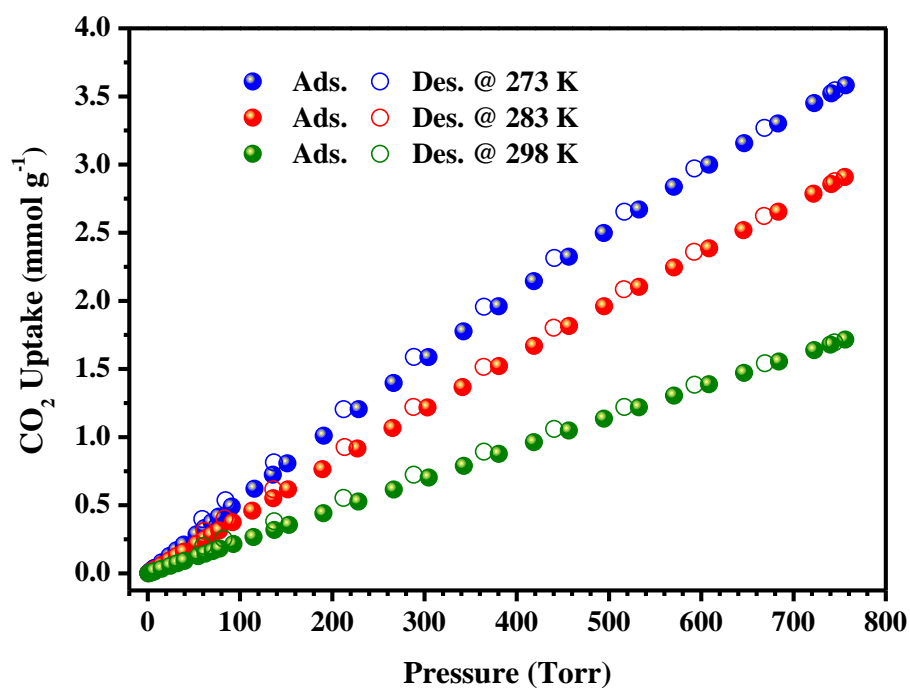

**Figure S10.** Variable-temperature CO<sub>2</sub> sorption isotherm for SC-Ce-MOF-1.

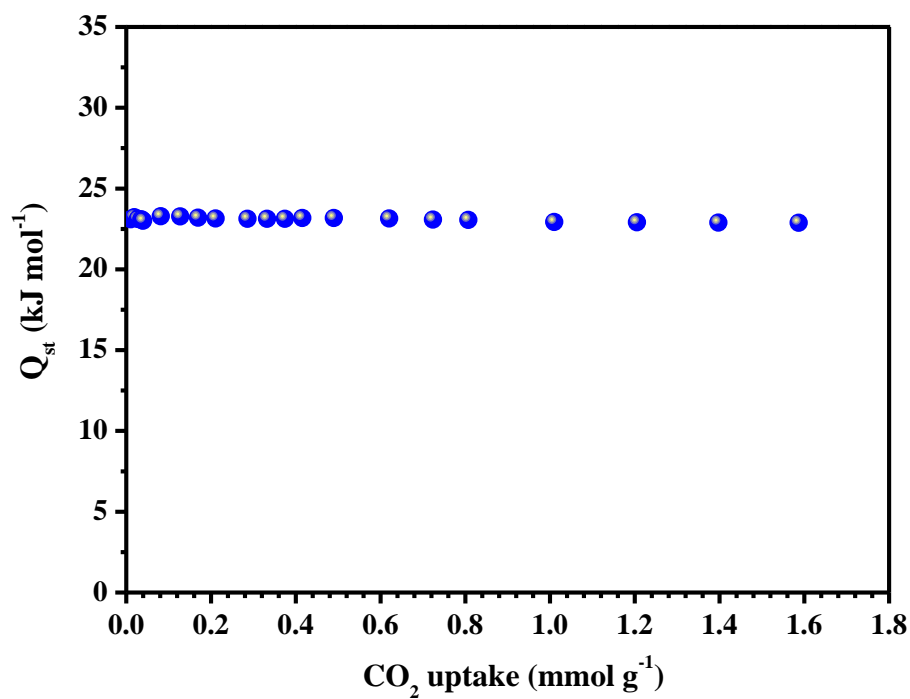

**Figure S11.** Isosteric heat of CO<sub>2</sub> adsorption of SC-Ce-MOF-1.

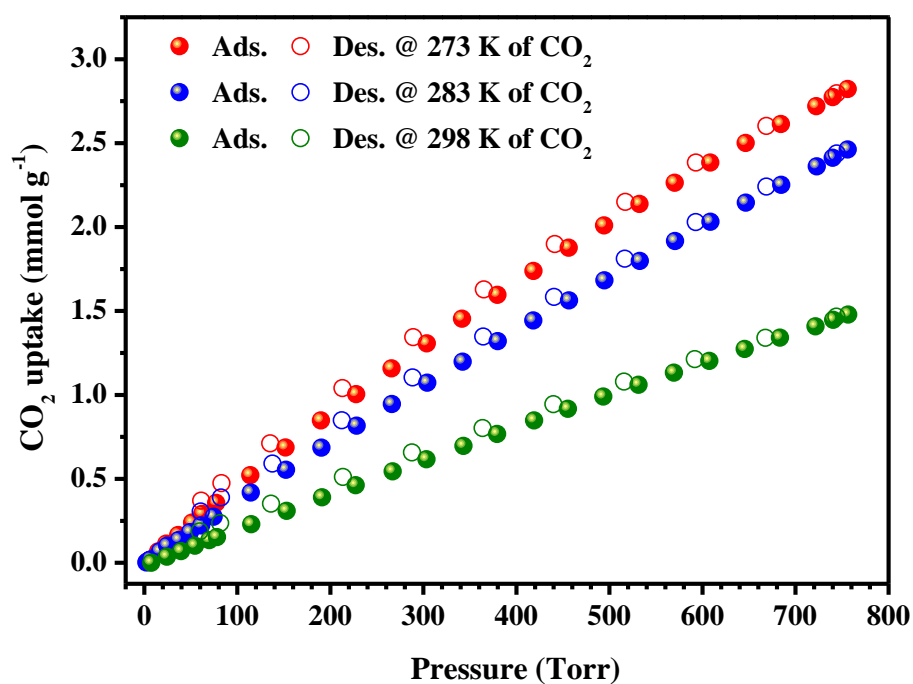

**Figure S12.** Variable-temperature CO<sub>2</sub> sorption isotherm for SC-Ce-MOF-2.

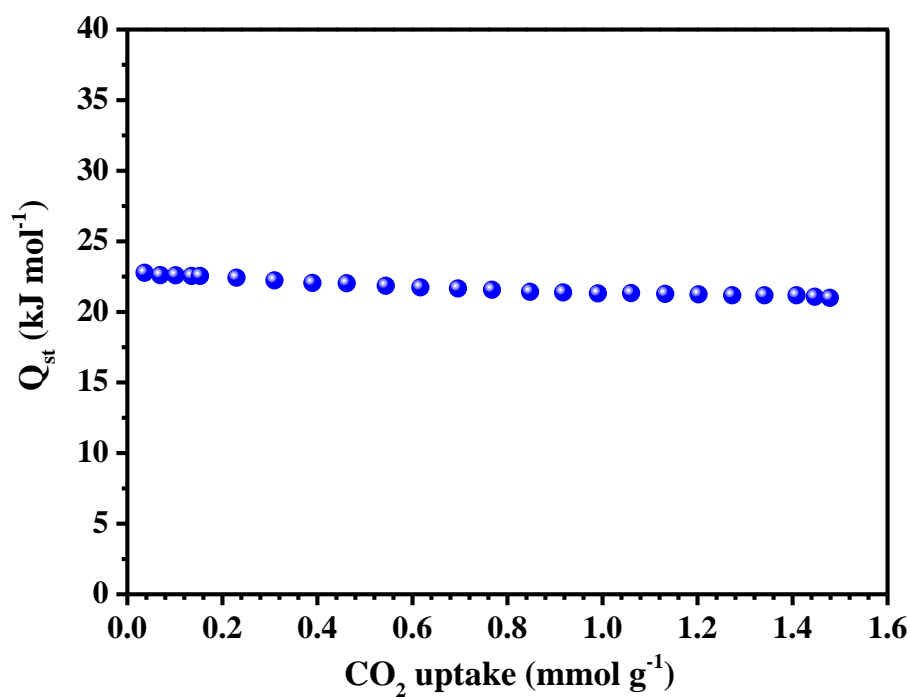

**Figure S13.** Isosteric heat of CO<sub>2</sub> adsorption of SC-Ce-MOF-2.

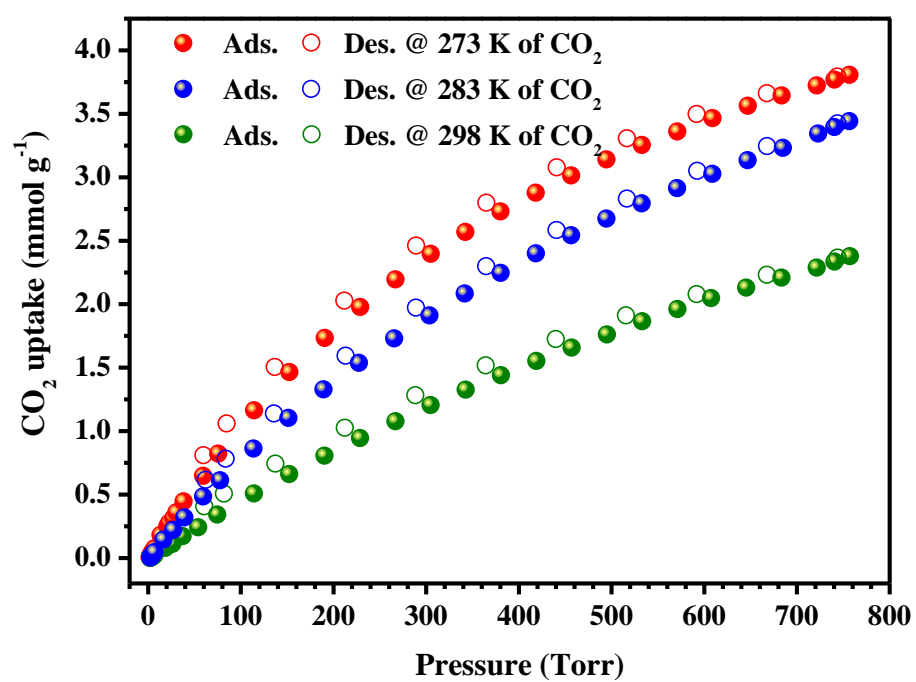

**Figure S14.** Variable-temperature CO<sub>2</sub> sorption isotherm for SC-Ce-MOF-3.

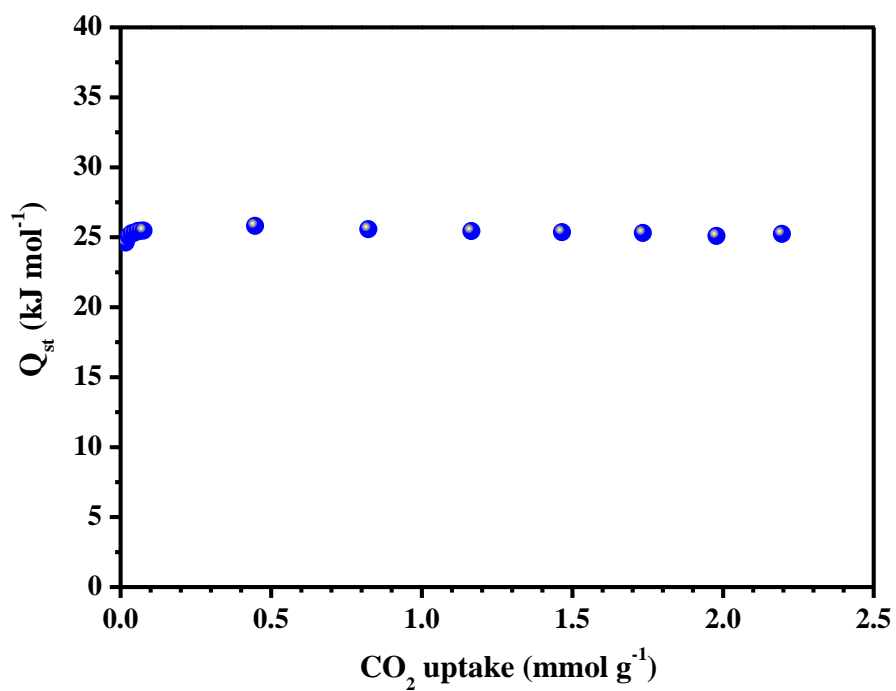

**Figure S15.** Isosteric heat of CO<sub>2</sub> adsorption of SC-Ce-MOF-3.

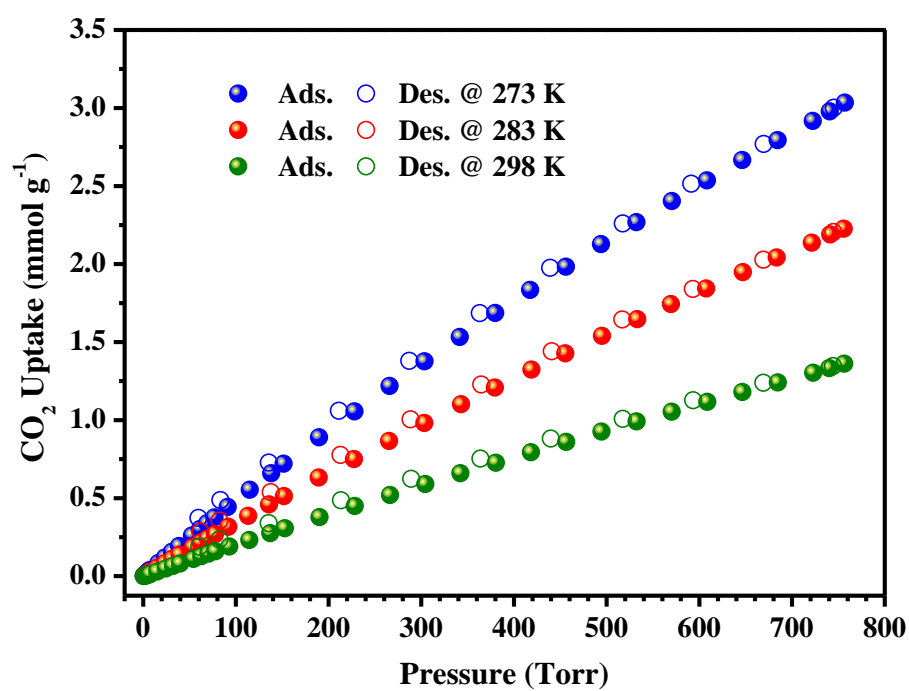

**Figure S16.** Variable-temperature CO<sub>2</sub> sorption isotherm for SC-Ce-MOF-4.

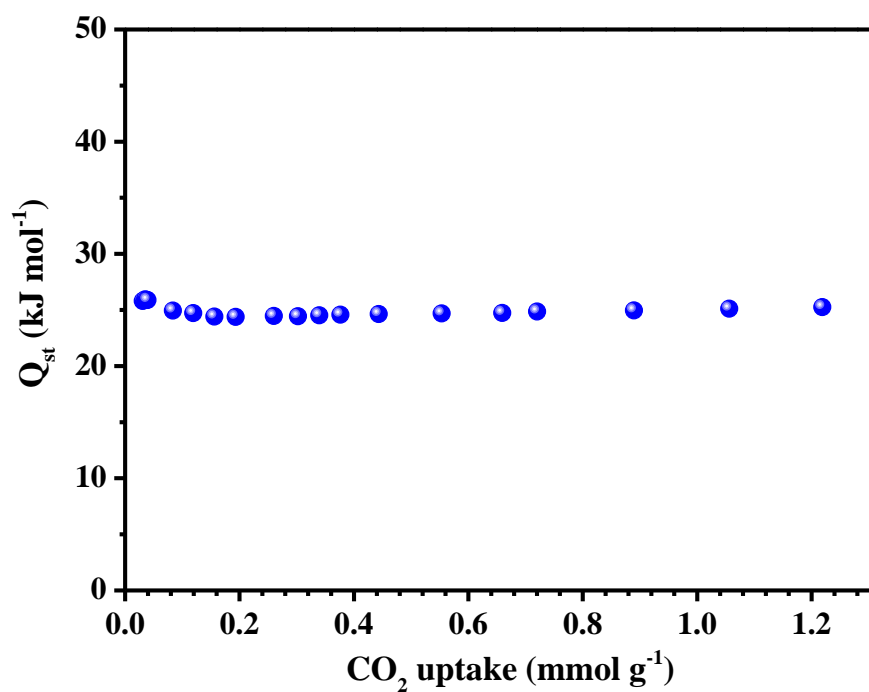

**Figure S17.** Isosteric heat of CO<sub>2</sub> adsorption of SC-Ce-MOF-4.



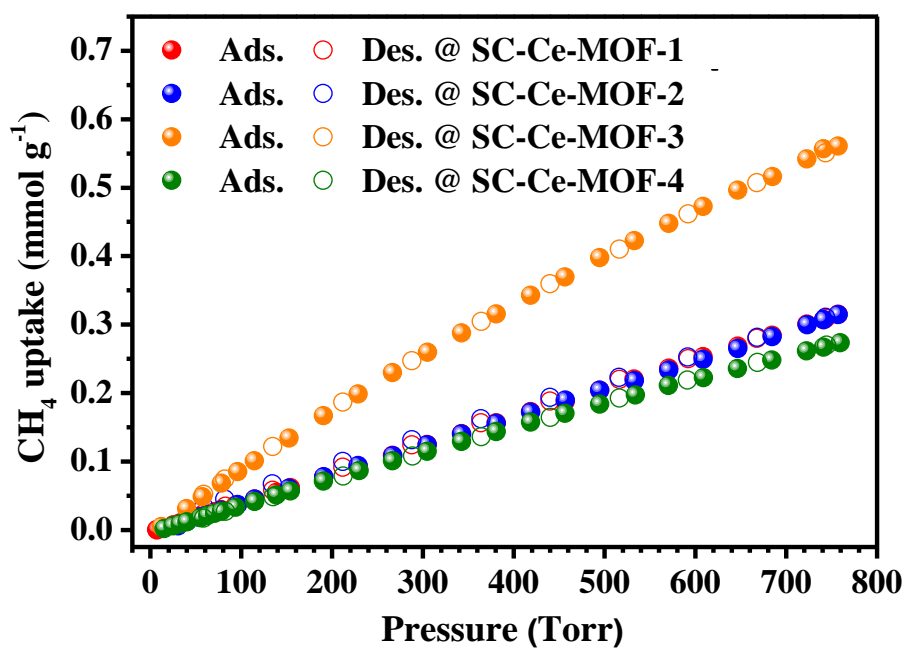

Figure S18. CH<sub>4</sub> sorption isotherms of SC-Ce-MOF-1–4 at 298 K.

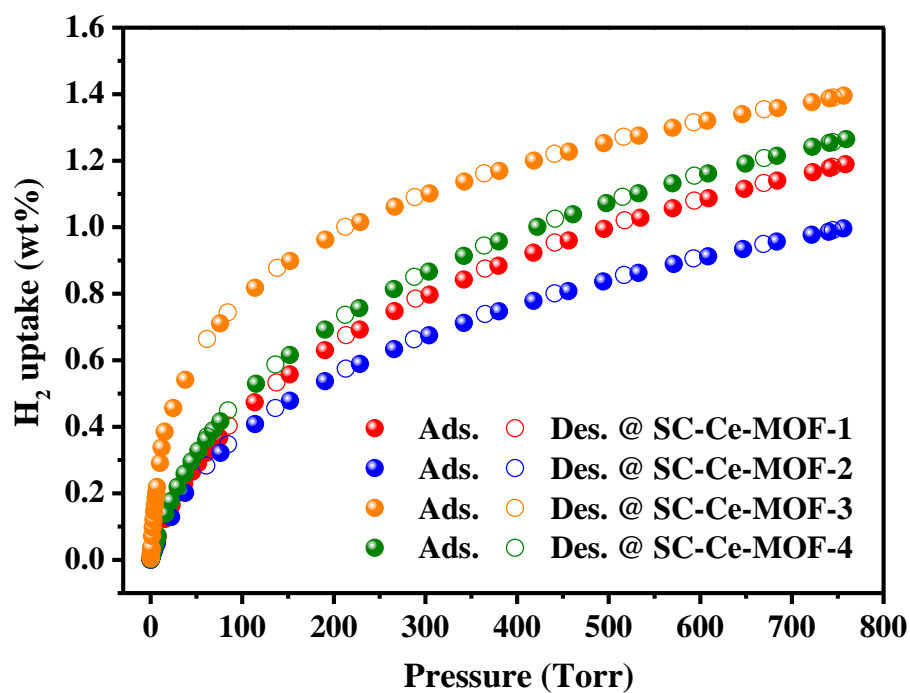

Figure S19. H<sub>2</sub> adsorption isotherms at 77 K of SC-Ce-MOF-1–4.

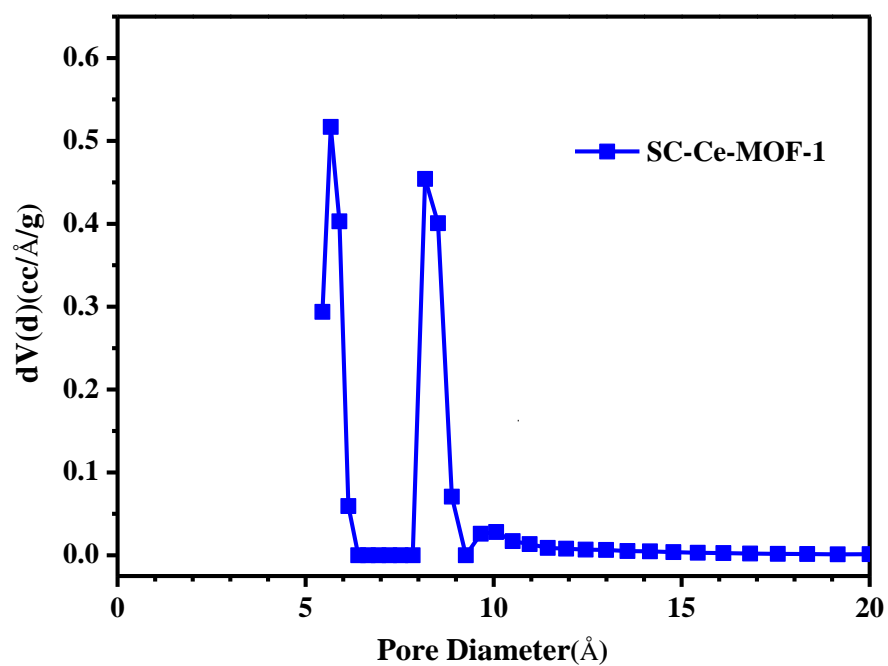

**Figure S20.** Pore size distribution of SC-Ce-MOF-1.

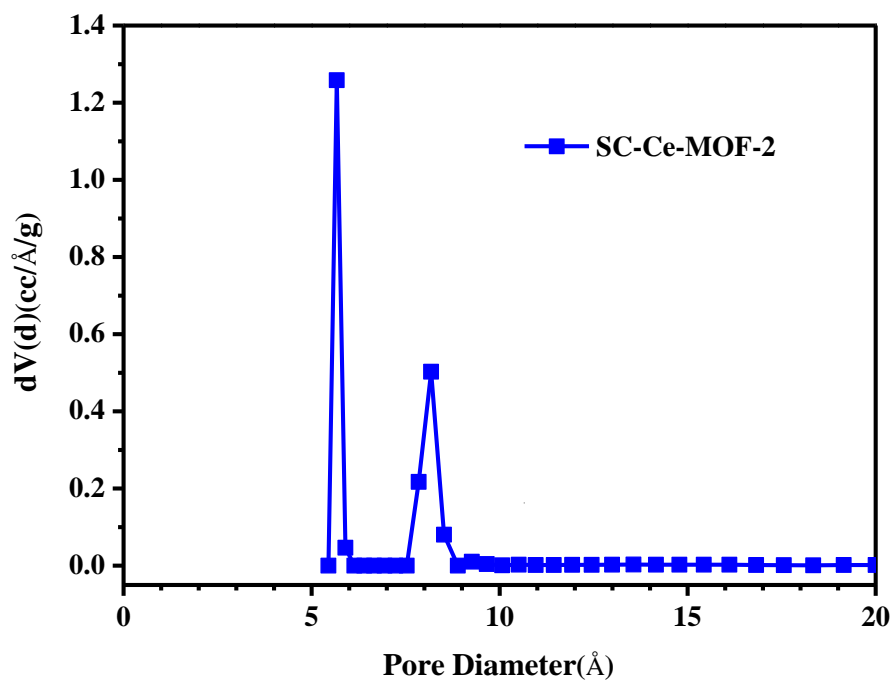

**Figure S21.** Pore size distribution of SC-Ce-MOF-2.

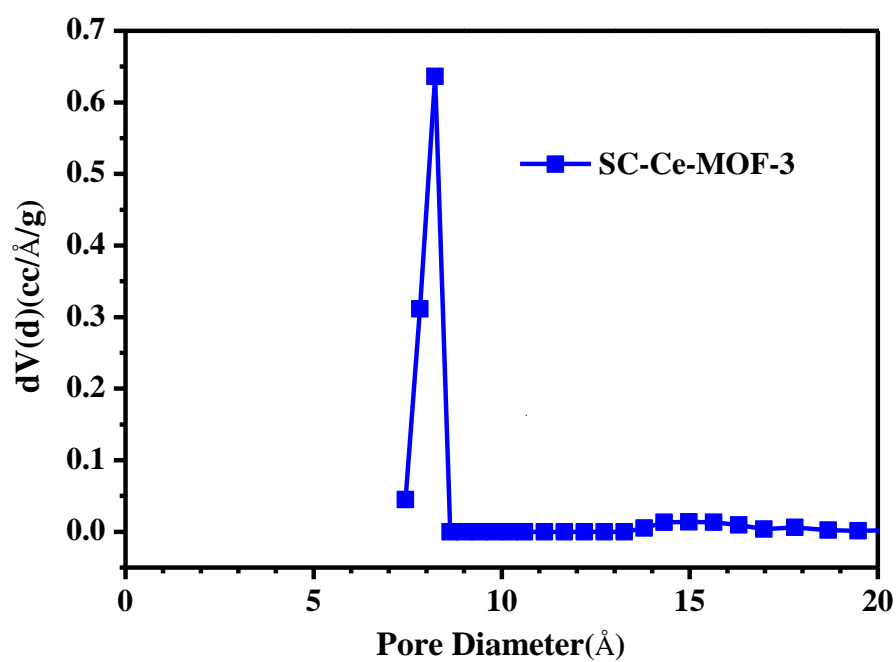

**Figure S22.** Pore size distribution of SC-Ce-MOF-3.

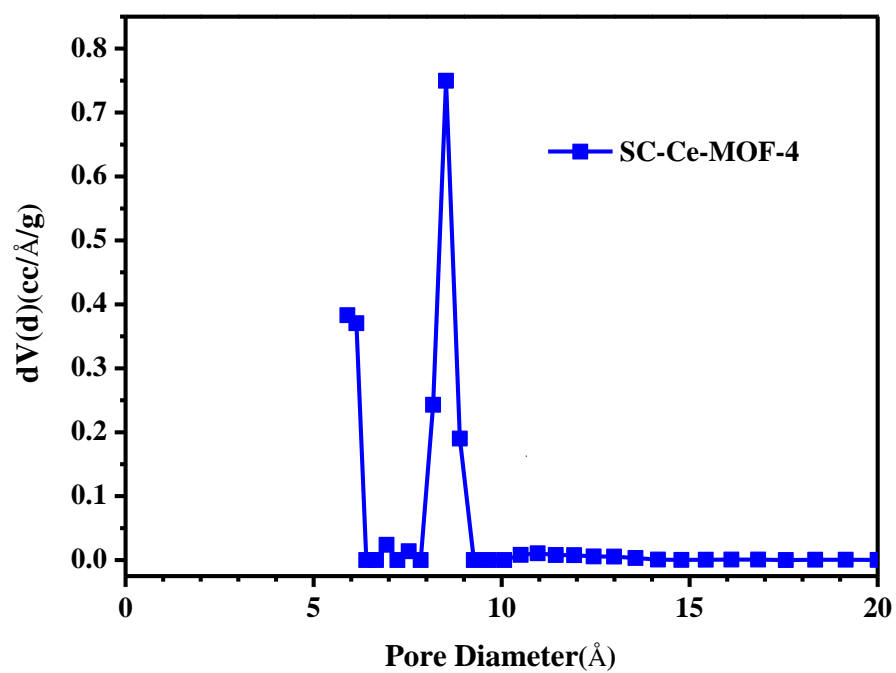

**Figure S23.** Pore size distribution of SC-Ce-MOF-4.

## Section 6. Crystal Images.

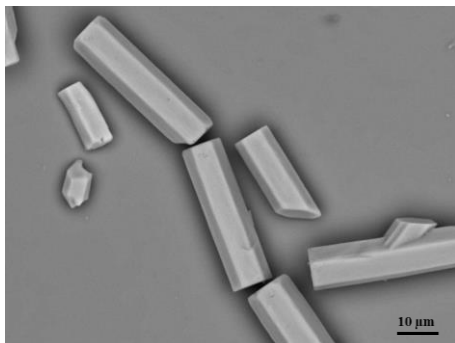

**Figure S24.** SEM image for SC-Ce-MOF-2, showing the hexagonal prism morphology.

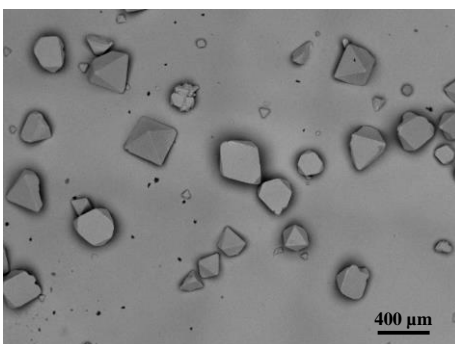

**Figure S25.** SEM image for SC-Ce-MOF-4, showing the octahedron morphology.

## Section 7. Single-Crystal X-Ray Crystallography.

Single-crystal X-ray diffraction data for SC-Ce-MOF-1 and SC-Ce-MOF-3 were collected on a Bruker D8 quest diffractometer (Mo/ $K\alpha$ ,  $\lambda = 0.71073$  Å) and SC-Ce-MOF-2 and SC-Ce-MOF-4 was collected on a Bruker D8 venture diffractometer (Cu/ $K\alpha$ ,  $\lambda = 1.5418$  Å) at 153 K, respectively. Indexing was performed using APEX2 (Difference Vectors method).<sup>1</sup> Data integration and reduction were performed using SaintPlus 6.01.<sup>2</sup> Absorption correction was performed by multi-scan method implemented in SADABS.<sup>3</sup> Space groups were determined using XPREP implemented in APEX2. The structures were solved by direct methods and refined with full-matrix least squares technique using the SHELXT<sup>4</sup> package or refined using SHELXL-2014 (full-matrix least-squares on  $F^2$ ) contained in Olex2.<sup>5</sup> Non-hydrogen atoms were refined with anisotropic displacement parameters during the final cycles. Hydrogen atoms were located at geometrically calculated positions to their carrier atoms and refined with isotropic thermal parameters included in the final stage of the refinement. For all compounds, the contributions of heavily disordered solvent molecules were treated as diffuse using Squeeze procedure implemented in Platon program.<sup>6-7</sup> Crystal data and refinement conditions are shown in Tables S1-4.

Table S1. Crystal data and structure refinement for SC-Ce-MOF-1.

|                                         |                                          |                      |
|-----------------------------------------|------------------------------------------|----------------------|
| Identification code                     | SC-Ce-MOF-1                              |                      |
| Empirical formula                       | $C_{48}H_{24}Ce_6O_{38}$                 |                      |
| Formula weight                          | 2049.39                                  |                      |
| Temperature                             | 153(2) K                                 |                      |
| Wavelength                              | 0.71073 Å                                |                      |
| Crystal system                          | Hexagonal                                |                      |
| Space group                             | $P6_3/mmc$                               |                      |
| Unit cell dimensions                    | $a = 15.5561(2)$ Å                       | $\alpha = 90^\circ$  |
|                                         | $b = 15.5561(2)$ Å                       | $\beta = 90^\circ$   |
|                                         | $c = 28.1098(6)$ Å                       | $\gamma = 120^\circ$ |
| Volume                                  | 5891.0(2) Å <sup>3</sup>                 |                      |
| Z                                       | 2                                        |                      |
| Density (calculated)                    | 1.155 Mg/m <sup>3</sup>                  |                      |
| Absorption coefficient                  | 2.322 mm <sup>-1</sup>                   |                      |
| F(000)                                  | 1928                                     |                      |
| Crystal size                            | 0.100 x 0.100 x 0.060 mm <sup>3</sup>    |                      |
| Theta range for data collection         | 2.648 to 25.995°                         |                      |
| Index ranges                            | -19 ≤ h ≤ 19, -19 ≤ k ≤ 19, -34 ≤ l ≤ 34 |                      |
| Reflections collected                   | 61525                                    |                      |
| Independent reflections                 | 2193 [ $R(\text{int}) = 0.0444$ ]        |                      |
| Completeness to $\theta = 25.242^\circ$ | 99.4 %                                   |                      |
| Refinement method                       | Full-matrix least-squares on $F^2$       |                      |
| Data / restraints / parameters          | 2193 / 0 / 85                            |                      |
| Goodness-of-fit on $F^2$                | 1.107                                    |                      |
| Final $R$ indices [ $I > 2\sigma(I)$ ]  | $R_1 = 0.0351$ , $wR_2 = 0.0826$         |                      |
| $R$ indices (all data)                  | $R_1 = 0.0409$ , $wR_2 = 0.0861$         |                      |
| Largest diff. peak and hole             | 1.162 and -1.310 e.Å <sup>-3</sup>       |                      |

Table S2. Crystal data and structure refinement for SC-Ce-MOF-2.

|                                                     |                                                                                         |                      |
|-----------------------------------------------------|-----------------------------------------------------------------------------------------|----------------------|
| Identification code                                 | SC-Ce-MOF-2                                                                             |                      |
| Empirical formula                                   | C <sub>3.84</sub> H <sub>0</sub> Ce <sub>0.48</sub> F <sub>0.48</sub> O <sub>3.04</sub> |                      |
| Formula weight                                      | 171.14                                                                                  |                      |
| Temperature                                         | 153(2) K                                                                                |                      |
| Wavelength                                          | 1.54178 Å                                                                               |                      |
| Crystal system                                      | Hexagonal                                                                               |                      |
| Space group                                         | <i>P6<sub>3</sub>/mmc</i>                                                               |                      |
| Unit cell dimensions                                | <i>a</i> = 15.5719(4) Å                                                                 | $\alpha = 90^\circ$  |
|                                                     | <i>b</i> = 15.5719(4) Å                                                                 | $\beta = 90^\circ$   |
|                                                     | <i>c</i> = 28.1777(7) Å                                                                 | $\gamma = 120^\circ$ |
| Volume                                              | 5917.2(3) Å <sup>3</sup>                                                                |                      |
| <i>Z</i>                                            | 25                                                                                      |                      |
| Density (calculated)                                | 1.201 Mg/m <sup>3</sup>                                                                 |                      |
| Absorption coefficient                              | 18.017 mm <sup>-1</sup>                                                                 |                      |
| F(000)                                              | 1988                                                                                    |                      |
| Crystal size                                        | 0.120 x 0.030 x 0.030 mm <sup>3</sup>                                                   |                      |
| Theta range for data collection                     | 3.633 to 70.126°.                                                                       |                      |
| Index ranges                                        | -11 ≤ <i>h</i> ≤ 18, -17 ≤ <i>k</i> ≤ 16, -34 ≤ <i>l</i> ≤ 26                           |                      |
| Reflections collected                               | 29089                                                                                   |                      |
| Independent reflections                             | 2147 [R(int) = 0.0371]                                                                  |                      |
| Completeness to theta = 67.679°                     | 99.9 %                                                                                  |                      |
| Refinement method                                   | Full-matrix least-squares on F <sup>2</sup>                                             |                      |
| Data / restraints / parameters                      | 2147 / 2 / 89                                                                           |                      |
| Goodness-of-fit on F <sup>2</sup>                   | 1.122                                                                                   |                      |
| Final <i>R</i> indices [ <i>I</i> > 2σ( <i>I</i> )] | <i>R</i> <sub>1</sub> = 0.0311, <i>wR</i> <sub>2</sub> = 0.0937                         |                      |
| <i>R</i> indices (all data)                         | <i>R</i> <sub>1</sub> = 0.0324, <i>wR</i> <sub>2</sub> = 0.0951                         |                      |
| Extinction coefficient                              | 0.00002(2)                                                                              |                      |
| Largest diff. peak and hole                         | 0.959 and -0.542 e.Å <sup>-3</sup>                                                      |                      |

Table S3. Crystal data and structure refinement for SC-Ce-MOF-3.

|                                        |                                                   |                     |
|----------------------------------------|---------------------------------------------------|---------------------|
| Identification code                    | SC-Ce-MOF-3                                       |                     |
| Empirical formula                      | $\text{C}_{24}\text{Ce}_3\text{N}_3\text{O}_{19}$ |                     |
| Formula weight                         | 1012.60                                           |                     |
| Temperature                            | 153(2) K                                          |                     |
| Wavelength                             | 0.71073 Å                                         |                     |
| Crystal system                         | Cubic                                             |                     |
| Space group                            | $Fm-3m$                                           |                     |
| Unit cell dimensions                   | $a = 22.1418(2)$ Å                                | $\alpha = 90^\circ$ |
| Volume                                 | 10855.2(3) Å <sup>3</sup>                         |                     |
| Z                                      | 8                                                 |                     |
| Density (calculated)                   | 1.239 Mg/m <sup>3</sup>                           |                     |
| Absorption coefficient                 | 2.520 mm <sup>-1</sup>                            |                     |
| F(000)                                 | 3760                                              |                     |
| Crystal size                           | 0.040 x 0.040 x 0.040 mm <sup>3</sup>             |                     |
| Theta range for data collection        | 2.602 to 27.487°                                  |                     |
| Index ranges                           | -28 ≤ h ≤ 25, -26 ≤ k ≤ 26, -28 ≤ l ≤ 20          |                     |
| Reflections collected                  | 9867                                              |                     |
| Independent reflections                | 689 [ $R(\text{int}) = 0.0401$ ]                  |                     |
| Completeness to theta = 25.242°        | 99.6 %                                            |                     |
| Refinement method                      | Full-matrix least-squares on $F^2$                |                     |
| Data / restraints / parameters         | 689 / 0 / 33                                      |                     |
| Goodness-of-fit on $F^2$               | 1.193                                             |                     |
| Final $R$ indices [ $I > 2\sigma(I)$ ] | $R_1 = 0.0487$ , $wR_2 = 0.1209$                  |                     |
| $R$ indices (all data)                 | $R_1 = 0.0518$ , $wR_2 = 0.1223$                  |                     |
| Extinction coefficient                 | 0.00012(3)                                        |                     |
| Largest diff. peak and hole            | 1.574 and -1.026 e.Å <sup>-3</sup>                |                     |



Table S4. Crystal data and structure refinement for SC-Ce-MOF-4.

|                                      |                                                |                     |
|--------------------------------------|------------------------------------------------|---------------------|
| Identification code                  | SC-Ce-MOF-4                                    |                     |
| Empirical formula                    | $\text{C}_{24}\text{H}_{12}\text{CeO}_{10.33}$ |                     |
| Formula weight                       | 605.79                                         |                     |
| Temperature                          | 153(2) K                                       |                     |
| Wavelength                           | 1.54178 Å                                      |                     |
| Crystal system                       | Cubic                                          |                     |
| Space group                          | $Fm-3m$                                        |                     |
| Unit cell dimensions                 | $a = 25.0373(5)$ Å                             | $\alpha = 90^\circ$ |
| Volume                               | 15695.0(9) Å <sup>3</sup>                      |                     |
| Z                                    | 24                                             |                     |
| Density (calculated)                 | 1.538 Mg/m <sup>3</sup>                        |                     |
| Absorption coefficient               | 13.916 mm <sup>-1</sup>                        |                     |
| F(000)                               | 7120                                           |                     |
| Crystal size                         | 0.090 x 0.070 x 0.050 mm <sup>3</sup>          |                     |
| Theta range for data collection      | 4.996 to 65.039°                               |                     |
| Index ranges                         | -27 ≤ h ≤ 28, -23 ≤ k ≤ 19, -29 ≤ l ≤ 9        |                     |
| Reflections collected                | 6450                                           |                     |
| Independent reflections              | 721 [ $R(\text{int}) = 0.0239$ ]               |                     |
| Completeness to theta = 65.039°      | 98.5 %                                         |                     |
| Refinement method                    | Full-matrix least-squares on F <sup>2</sup>    |                     |
| Data / restraints / parameters       | 721 / 340 / 154                                |                     |
| Goodness-of-fit on F <sup>2</sup>    | 1.327                                          |                     |
| Final R indices [ $I > 2\sigma(I)$ ] | $R_1 = 0.1187$ , $wR_2 = 0.3302$               |                     |
| R indices (all data)                 | $R_1 = 0.1188$ , $wR_2 = 0.3302$               |                     |
| Extinction coefficient               | 0.00037(10)                                    |                     |
| Largest diff. peak and hole          | 1.782 and -1.167 e.Å <sup>-3</sup>             |                     |

## Section 8. References.

---

- (1) Bruker (2010). APEX2 Bruker AXS Inc., Madison, Wisconsin, USA.
- (2) Bruker (2009). SAINT V8.35A. Data Reduction Software.
- (3) Sheldrick, G. M. (1996). SADABS. Program for Empirical Absorption Correction. University of Gottingen, Germany.
- (4) XT, Sheldrick, G. M. Acta Cryst. (2015). A71, 3-8.
- (5) Dolomanov, O.V.; Bourhis, L. J.; Gildea, R. J.; Howard, J. A. K.; Puschmann, H. OLEX2: A complete structure solution, refinement and analysis program (2009). J. Appl. Cryst., 42, 339-341.
- (6) Spek, T. L. Acta Cryst. 1990, A46, 194-201.
- (7) Spek, T. L. Acta Cryst. 1990, A46, c34.
